# Supplementary material for: Partial p53 reactivation is sufficient to induce cancer regression
Source: Springer Nature journal article supplement (doi:10.1186/s13046-022-02269-6), 2022-03-02
Supplement: MOESM1 [file 20185614]

## Supplemental Information

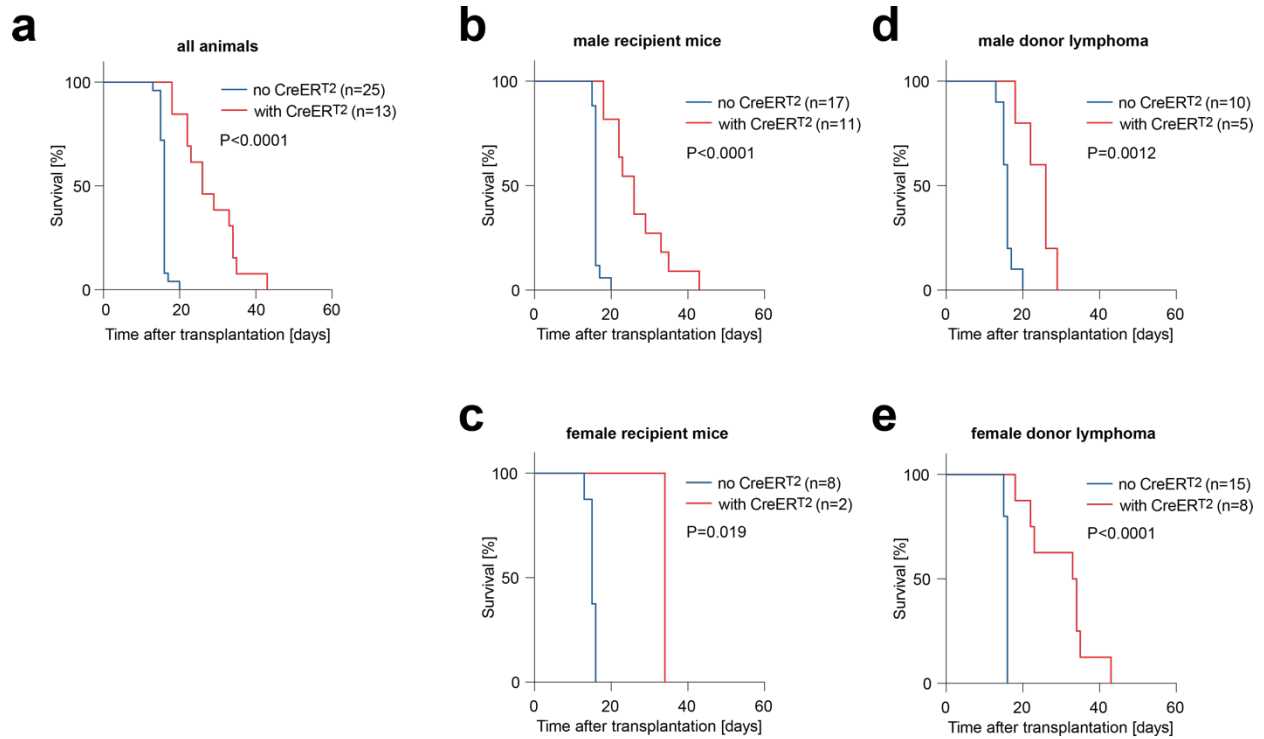

**Supplemental Fig. S1.**  $E\mu Myc$ ;  $Trp53^{LSL-E177R/-}$  lymphomas with (n=13) or without (n=25) the  $Rosa26^{CreERT2}$  transgene were transplanted into immunocompetent 129/B6 F1 hybrid mice and, after confirmation of disease onset, treated 1 week with daily i.p. injections of 1 mg tamoxifen. Mice were euthanized when humane endpoint criteria were reached. Shown are Kaplan-Meier survival graphs with P-values of the Log-rank (Mantel-Cox) test. **a** all animals in the study. **b** only male recipient mice. **c** only female recipient mice. **d** only animals transplanted with lymphoma cells from male donor mice. **e** only animals transplanted with lymphoma cells from female donor mice.

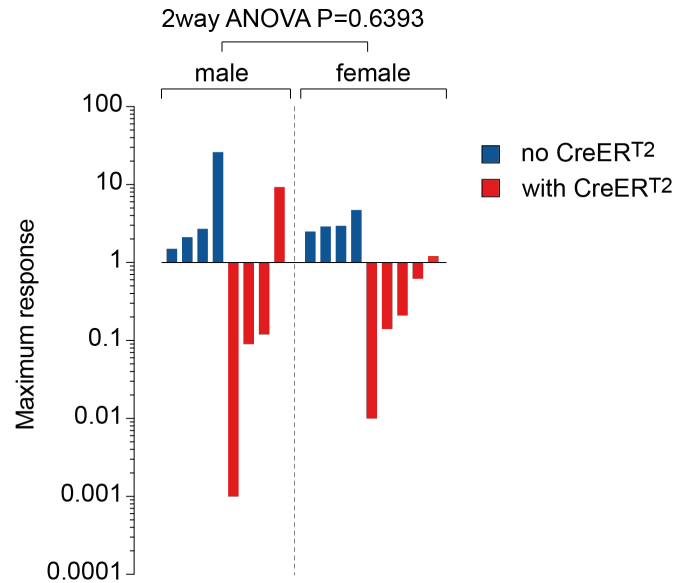

**Supplemental Fig. S2** *Trp53*<sup>LSL-E177R/LSL-E177R</sup> mice (*p53*<sup>LSL/LSL</sup>) with or without the *Rosa26*<sup>CreERT2</sup> (*CreERT2*) transgene that were diagnosed with thymic lymphoma by MRI were treated 1 week with daily i.p. injections of 1 mg tamoxifen and were re-examined by MRI 7, 14, and 28 days after treatment start. Shown is the maximum response (fold increase in tumor volume) in individual male and female mice. Reported is the P-value of of a 2way ANOVA analysis for the interaction between sex and genotype/reactivation.

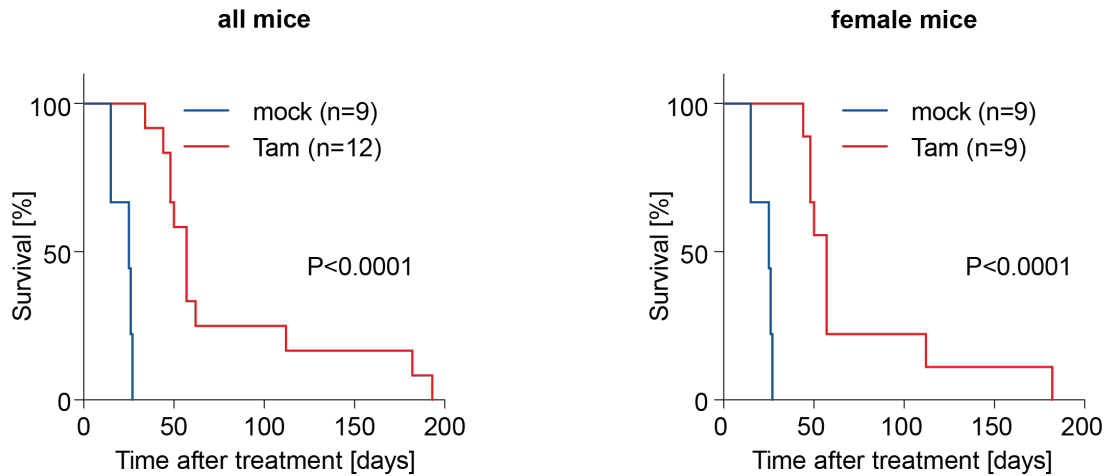

**Supplemental Fig. S3** Female LSL-E177R; CreER<sup>T2</sup> (LSL) AML cells were transplanted into sublethally irradiated 129X1 albino x B6 albino (F1 hybrid) mice. After engraftment was confirmed by bioluminescence imaging (BLI), mice were treated 1 week with daily i.p. injections of either vehicle (corn oil) or 1 mg tamoxifen. Mice were euthanized when humane endpoint criteria were reached. Shown are Kaplan-Meier survival graphs for all (left) and female-only recipient mice (right). Reported are P-values of the Log-rank (Mantel-Cox) test for mock vs. Tam.
